# Supplementary material
Source: publisher site journal article supplement (https://static.cambridge.org/content/id/urn:cambridge.org:id:article:S1751731119002969/resource/name/S1751731119002969supp001.doc)
Supplement: Supplementary file 1 [file S1751731119002969supp001.doc]

**Branched-chain volatile fatty acids and folic acid accelerated the growth of Holstein dairy calves by stimulating nutrient digestion and rumen metabolism**

Y.R. Liu, H.S. Du, Z.Z. Wu, C. Wang, Q. Liu, G. Guo, W.J. Huo, Y.L. Zhang, C.X. Pei and S.L. Zhang

*Animal* Journal

**Supplementary Table S1** *PCR primers for real-time PCR assay*

| Target species | Primer sequence (5’) | GeneBank accession no. | Annealing  temperature (°C) | Size (bp) |
| --- | --- | --- | --- | --- |
| Total bacteria | F: CGGCAACGAGCGCAACCC  R: CCATTGTAGCACGTGTGTAGCC | AY548787.1 | 60 | 147 |
| Total anaerobic fungi | F: GAGGAAGTAAAAGTCGTAACAAGGTTTC  R: CAAATTCACAAAGGGTAGGATGATT | GQ355327.1 | 57.5 | 120 |
| Total protozoa | F: GCTTTCGWTGGTAGTGTATT  R: CTTGCCCTCYAATCGTWCT | HM212038.1 | 59 | 234 |
| Total methanogens | F: TTCGGTGGATCDCARAGRGC  R: GBARGTCGWAWCCGTAGAATCC | GQ339873.1 | 60 | 160 |
| *R. albus* | F: CCCTAAAAGCAGTCTTAGTTCG  R: CCTCCTTGCGGTTAGAACA | CP002403.1 | 60 | 176 |
| *R. flavefaciens* | F: ATTGTCCCAGTTCAGATTGC  R: GGCGTCCTCATTGCTGTTAG | AB849343.1 | 60 | 173 |
| *B. fibrisolvens* | F: ACCGCATAAGCGCACGGA  R: CGGGTCCATCTTGTACCGATAAAT | HQ404372.1 | 61 | 65 |
| *F.succinogenes* | F: GTTCGGAATTACTGGGCGTAAA  R: CGCCTGCCCCTGAACTATC | AB275512.1 | 61 | 121 |
| *Rb. amylophilus* | F: CTGGGGAGCTGCCTGAATG  R: GCATCTGAATGCGACTGGTTG | MH708240.1 | 60 | 102 |
| *P. ruminicola* | F: GAAAGTCGGATTAATGCTCTATGTTG  R: CATCCTATAGCGGTAAACCTTTGG | LT975683.1 | 58.5 | 74 |
